# Supplementary material for: Cross-variant protection against SARS-CoV-2 infection in hamsters immunized with monovalent and bivalent inactivated vaccines
Source: PubMed Central journal article supplement (PMC9305277; doi:10.7150/ijbs.72109), 2022-07-13
Supplement: ijbsv18p4781s1.pdf [file ijbsv18p4781s1.pdf]

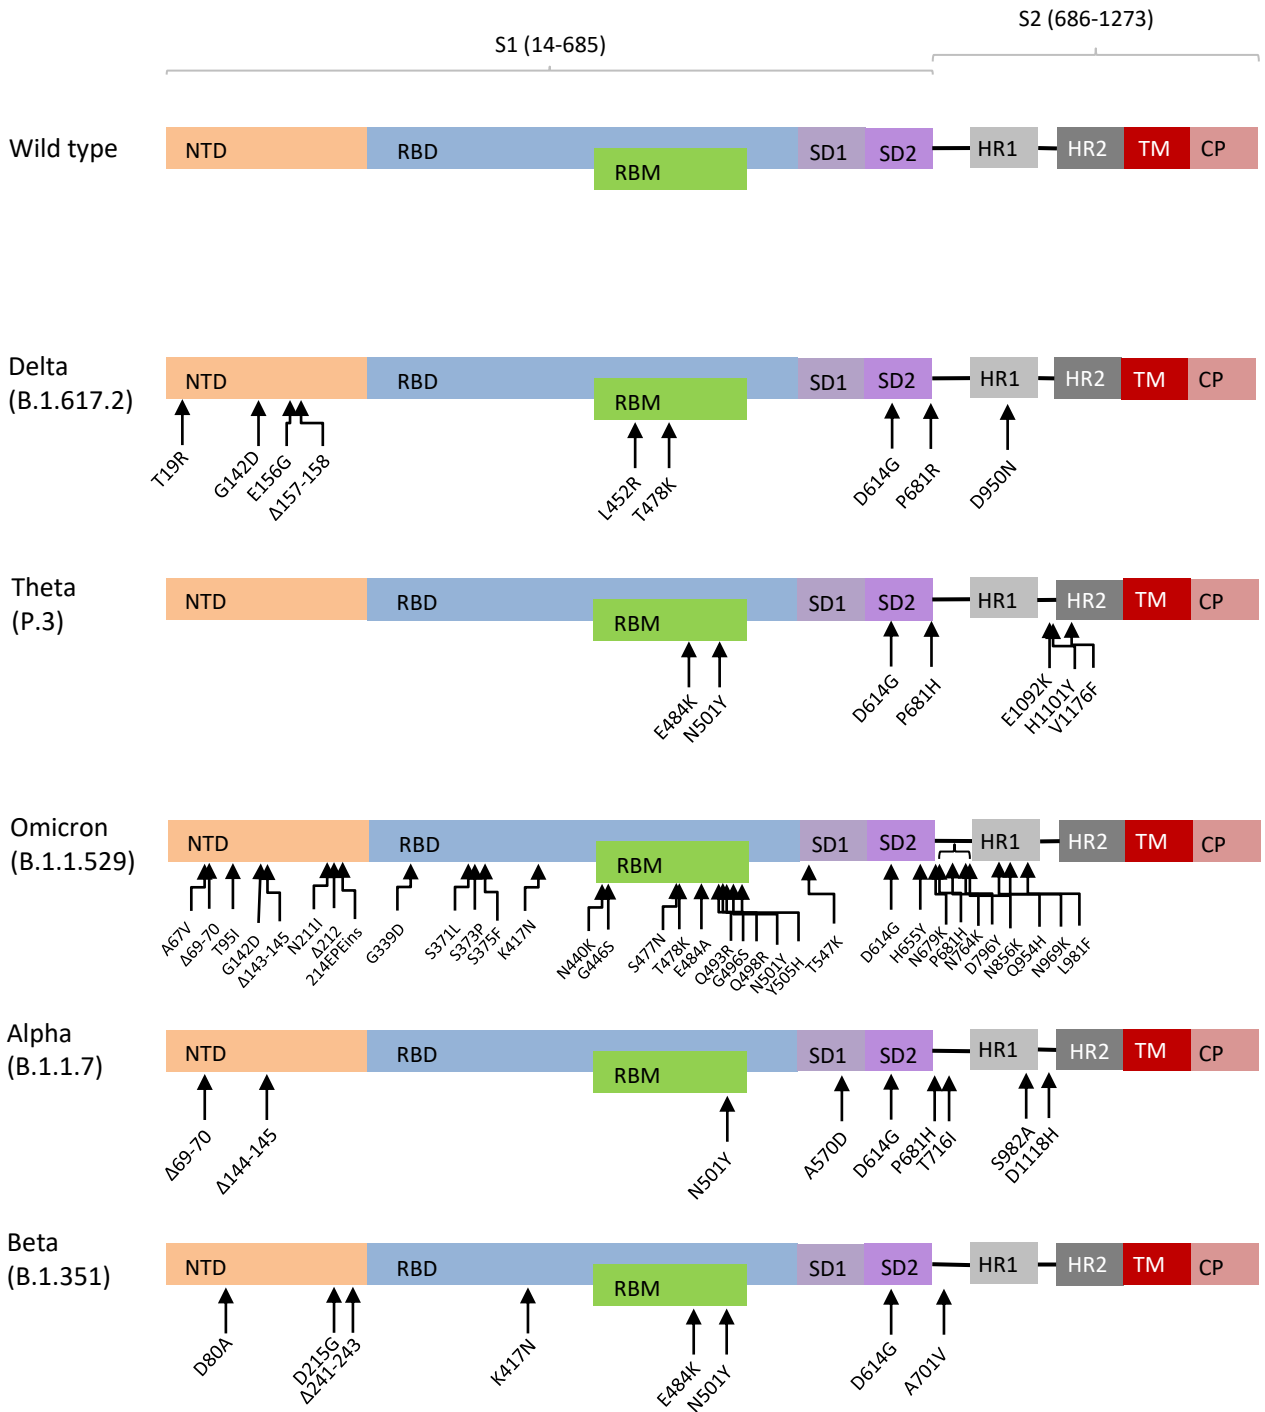

**Figure S1.** Mutations in S protein of SARS-CoV-2 VOCs. Schematic depiction of the locations of amino acid substitutions in the indicated four VOCs. Receptor binding domain (RBD) is shown in blue. N-terminal domain (NTD) is in orange. RBM: receptor-binding motif. SD1: subdomain 1. SD2: subdomain 2. HR1: heptad repeat 1. HR2: heptad repeat 2. TM: transmembrane domain. CP: cytoplasmic domain.

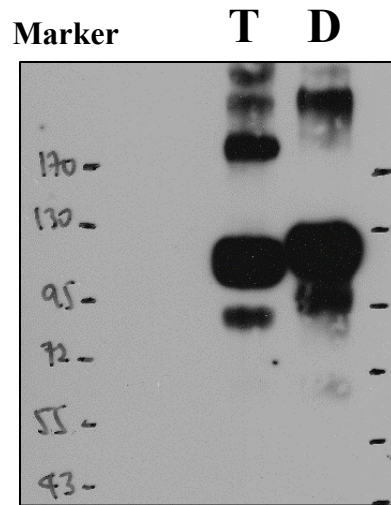

**Figure S2.** Expression of spike protein from the indicated SARS-CoV-2 strains by Western blotting. Lysates of Vero-E6-TMPRSS2 cells infected by the indicated strains were probed by anti-SARS-CoV-2 S antibodies.

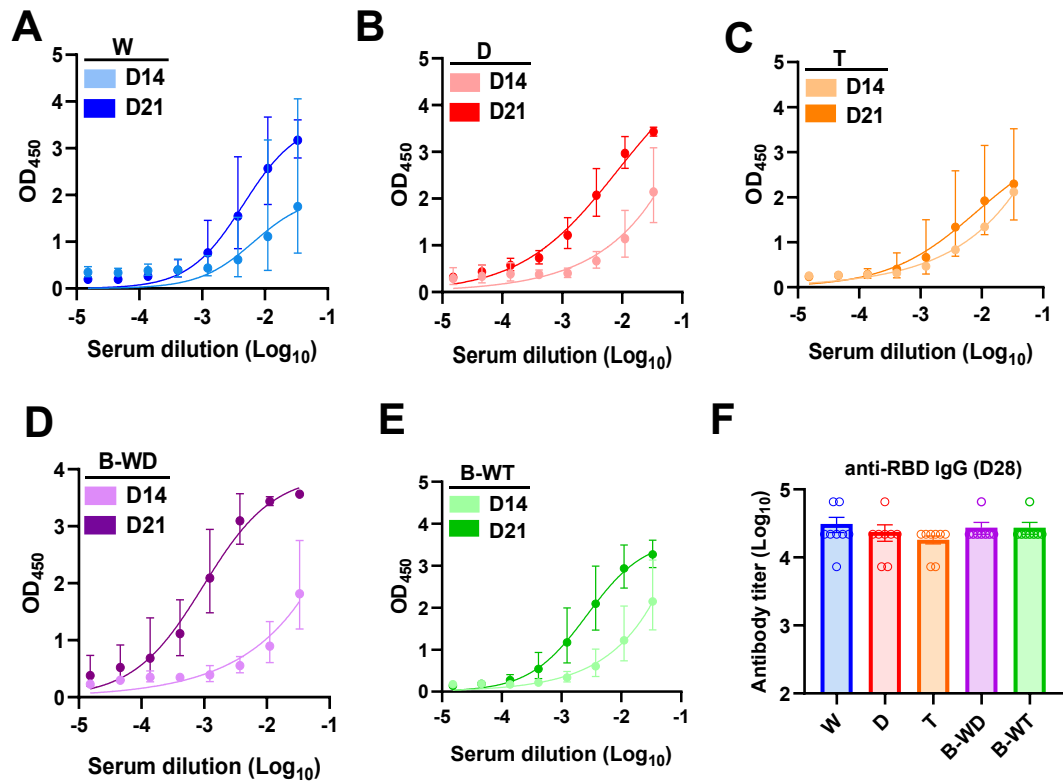

**Figure S3.** ELISA analysis of antibodies against SARS-CoV-2 RBD for the indicated groups collected at days 14 (D14), 21 (D21) and 28 (D28) post-vaccination. (A-E) IgG antibodies against SARS-CoV-2 RBD in hamsters immunized with the indicated vaccines detected by ELISA. (F) Endpoint titer of antibodies against SARS-CoV-2 RBD for the indicated groups collected at day 28 (D28) post-vaccination as detected by ELISA.

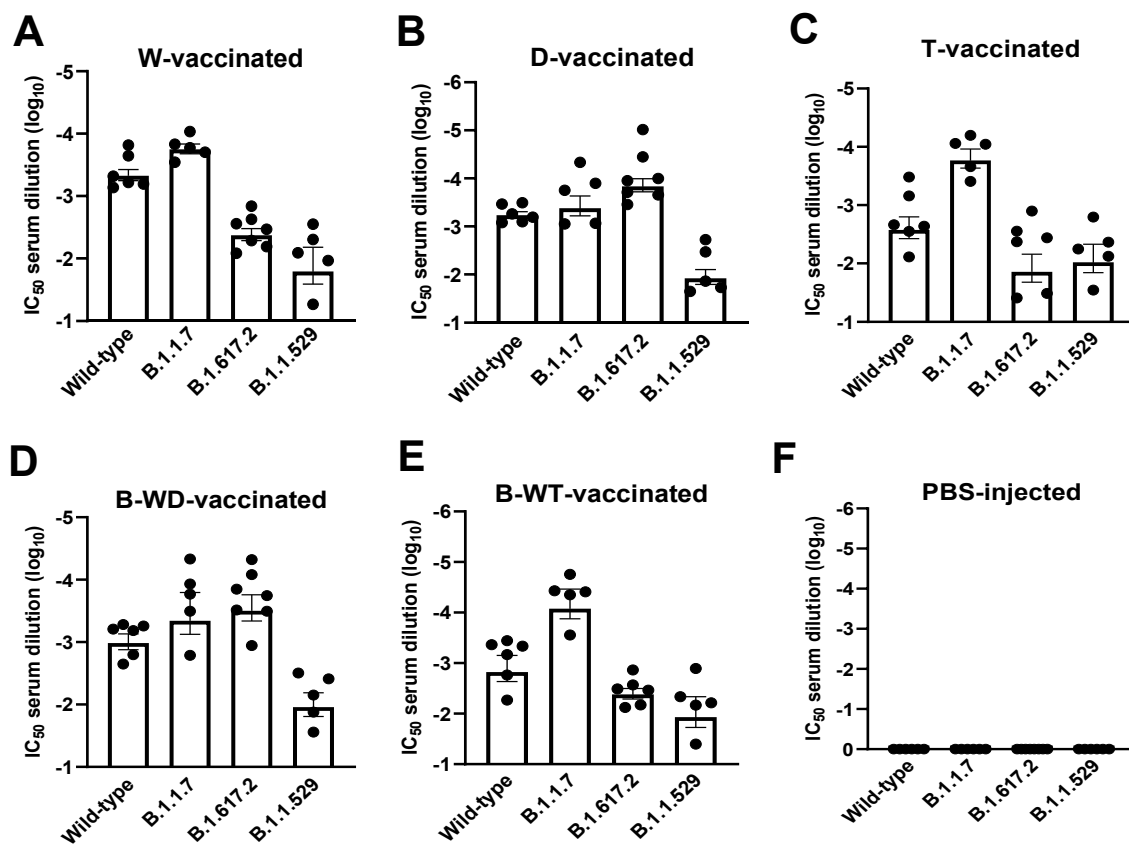

**Figure S4.** Neutralization activity of the serum samples collected at day 28 post-vaccination from hamsters immunized with the indicated types of inactivated vaccines detected by microneutralization assay.
